# Supplementary material for: Technical note: On uncertainties in plant water isotopic composition following extraction by cryogenic vacuum distillation
Source: Copernicus journal article supplement (doi:10.5194/hess-2022-178), 2022-05-09
Supplement: Supplementary file [file hess-2022-178-AC3-supplement.pdf]

**Table S2.** The percentage of moisture that was removed from the sample at different temperatures and for different hours, and the percentage of moisture that was absorbed by the dried sample after cap opening for 5 seconds.

| Material    | T (°C) | The percentage of moisture removed (%) |             |             |             | Water vapour absorbed in 5s (%) |
|-------------|--------|----------------------------------------|-------------|-------------|-------------|---------------------------------|
|             |        | 12h                                    | 24h         | 36h         | 48h         |                                 |
| Twig piece  | 60     | 5.55±0.06 a                            | 5.60±0.05 b | 5.74±0.05 c | 5.84±0.06 c | 0.72±0.11                       |
|             | 105    | 8.68±0.21 a                            | 8.89±0.12 a | 8.91±0.16 a | 8.89±0.08 a | 1.80±0.08                       |
| Stem powder | 60     | 5.05±0.04 a                            | 5.21±0.04 b | 5.31±0.07 c | 5.33±0.05 c | 0.72±0.06                       |
|             | 105    | 8.28±0.19 a                            | 8.32±0.25 a | 8.28±0.18 a | 8.28±0.10 a | 1.70±0.13                       |
| Caffeine    | 60     | 0.44±0.03 a                            | 0.41±0.09 a | 0.43±0.04 a | 0.43±0.04 a | 0.67±0.04                       |
|             | 105    | 1.50±0.15 a                            | 1.59±0.11 a | 1.62±0.09 a | 1.58±0.04 a | 1.53±0.09                       |

Note: Different letters in each row indicate a statistically significance difference at  $p < 0.05$  (T-test)
